# Supplementary material
Source: publisher figshare collection journal article supplement (https://sage.figshare.com/ndownloader/files/13627556)
Supplement: Supplementary file 1 [file 13627556]

## Appendix 2

### Genetic diversity of dominant plant species in tropical land-use systems on Sumatra, Indonesia

Natalie Breidenbach<sup>1\*</sup>, Sri Rahayu<sup>2</sup>, Iskandar Z. Siregar<sup>3</sup>, Ulfah J. Siregar<sup>3</sup>, Ir. Hamzah<sup>4</sup>, Reiner Finkeldey<sup>1,5</sup>

<sup>1</sup> Georg August University of Göttingen, Department of Forest Genetics and Forest Tree Breeding,

Büsgenweg 2, 37077 Göttingen, Germany

<sup>2</sup> Centre for Plant Conservation, Bogor Botanic Gardens, Indonesian Institute of Science (LIPI), Jl. Ir. H. Juanda, Bogor 16143, Indonesia

<sup>3</sup> Department of Silviculture, Faculty of Forestry, Bogor Agricultural University (IPB), Jl. Raya Dramaga, Bogor 16680, Indonesia

<sup>4</sup> Forestry Faculty, Jambi University, Jl. Lintas Jambi-Muara Bulian Km15, Jambi 36122, Indonesia

<sup>5</sup> Kassel University, Mönchbergstrasse 19, 34109 Kassel, Germany

\*Corresponding author Email: natalie.breidenbach@forst.uni-goettingen.de

### Tropical Conservation Science

| Fragment pool        | Species 1 | Species 2  | Species 3   | Species 4  | Species 5 | Species 6      | Species 7 |
|----------------------|-----------|------------|-------------|------------|-----------|----------------|-----------|
| Forest plot 1        | 10111100  | 0000000000 | 1011111100  | 0000000000 | 00000     | 00000000000000 | 101111100 |
| Forest plot 1        | 11111100  | 0000000000 | 1011110110  | 0000000000 | 00000     | 00000000000000 | 101001100 |
| Forest plot 1        | 10111111  | 0000000000 | 1000101100  | 0000000000 | 00000     | 00000000000000 | 101011100 |
| Forest plot 1        | 10111110  | 0000000000 | 1011110110  | 0000000000 | 00000     | 00000000000000 | 101110100 |
| Forest plot 1        | 10111000  | 0000000000 | 1011000011  | 0000000000 | 00000     | 00000000000000 | 101101100 |
| Forest plot 1        | 10101100  | 0000000000 | 1011110111  | 0000000000 | 00000     | 00000000000000 | 101111010 |
| Forest plot 1        | 10100100  | 0000000000 | 1100011100  | 0000000000 | 00000     | 00000000000000 | 101111011 |
| Forest plot 1        | 11111101  | 0000000000 | 10101000100 | 0000000000 | 00000     | 00000000000000 | 101111111 |
| Forest plot 1        | 00011100  | 0000000000 | 1010011101  | 0000000000 | 00000     | 00000000000000 | 101001100 |
| Forest plot 1        | 11111110  | 0000000000 | 1011110111  | 0000000000 | 00000     | 00000000000000 | 101110001 |
| Jungle rubber plot 1 | 00000000  | 1110111100 | 0000000000  | 0000000000 | 00000     | 00000000000000 | 111001100 |
| Jungle rubber plot 1 | 00000000  | 1011110011 | 0000000000  | 0000000000 | 00000     | 00000000000000 | 010111100 |
| Jungle rubber plot 1 | 00000000  | 1011110111 | 0000000000  | 0000000000 | 00000     | 00000000000000 | 100111100 |
| Jungle rubber plot 1 | 00000000  | 0001101100 | 0000000000  | 0000000000 | 00000     | 00000000000000 | 101011100 |
| Jungle rubber plot 1 | 00000000  | 1101111100 | 0000000000  | 0000000000 | 00000     | 00000000000000 | 101101100 |
| Jungle rubber plot 1 | 00000000  | 1011001100 | 0000000000  | 0000000000 | 00000     | 00000000000000 | 101111000 |
| Jungle rubber plot 1 | 00000000  | 1011011010 | 0000000000  | 0000000000 | 00000     | 00000000000000 | 101001110 |
| Jungle rubber plot 1 | 00000000  | 1010011100 | 0000000000  | 0000000000 | 00000     | 00000000000000 | 101001010 |
| Jungle rubber plot 1 | 00000000  | 1011110110 | 0000000000  | 0000000000 | 00000     | 00000000000000 | 101011100 |
| Jungle rubber plot 1 | 00000000  | 1000110110 | 0000000000  | 0000000000 | 00000     | 00000000000000 | 101111001 |
| Oil palm plot 3      | 00000000  | 0000000000 | 0000000000  | 1111110110 | 00000     | 1011110001010  | 000000000 |
| Oil palm plot 3      | 00000000  | 0000000000 | 0000000000  | 1001111100 | 00000     | 1011111111100  | 000000000 |
| Oil palm plot 3      | 00000000  | 0000000000 | 0000000000  | 1010110110 | 00000     | 1011100111100  | 000000000 |
| Oil palm plot 3      | 00000000  | 0000000000 | 0000000000  | 1011110111 | 00000     | 1010101011100  | 000000000 |
| Oil palm plot 3      | 00000000  | 0000000000 | 0000000000  | 1011110001 | 00000     | 1011110011111  | 000000000 |
| Oil palm plot 3      | 00000000  | 0000000000 | 0000000000  | 1010101011 | 00000     | 1011001101110  | 000000000 |
| Oil palm plot 3      | 00000000  | 0000000000 | 0000000000  | 1011001011 | 00000     | 1110001111001  | 000000000 |
| Oil palm plot 3      | 00000000  | 0000000000 | 0000000000  | 1110011100 | 00000     | 1010011001100  | 000000000 |
| Oil palm plot 3      | 00000000  | 0000000000 | 0000000000  | 1010011100 | 00000     | 1000100111010  | 000000000 |
| Oil palm plot 3      | 00000000  | 0000000000 | 0000000000  | 1100111100 | 00000     | 1011110111110  | 000000000 |
| Rubber plot 6        | 00000000  | 0000000000 | 0000000000  | 1011001001 | 10100     | 0111110101010  | 000000000 |
| Rubber plot 6        | 00000000  | 0000000000 | 0000000000  | 1001101100 | 11100     | 0101010101010  | 000000000 |
| Rubber plot 6        | 00000000  | 0000000000 | 0000000000  | 1011110111 | 10110     | 0011101010101  | 000000000 |
| Rubber plot 6        | 00000000  | 0000000000 | 0000000000  | 1001111011 | 10101     | 0111011101010  | 000000000 |
| Rubber plot 6        | 00000000  | 0000000000 | 0000000000  | 1011111111 | 11100     | 0010101010111  | 000000000 |
| Rubber plot 6        | 00000000  | 0000000000 | 0000000000  | 1011000111 | 11110     | 0111010101011  | 000000000 |
| Rubber plot 6        | 00000000  | 0000000000 | 0000000000  | 1010011100 | 11101     | 0110111101010  | 000000000 |
| Rubber plot 6        | 00000000  | 0000000000 | 0000000000  | 1111101110 | 11111     | 0101010101001  | 000000000 |
| Rubber plot 6        | 00000000  | 0000000000 | 0000000000  | 1011110110 | 00111     | 1010101011011  | 000000000 |
| Rubber plot 6        | 00000000  | 0000000000 | 0000000000  | 1011111100 | 00110     | 0011110101010  | 000000000 |

**Appendix 2:** Illustration of the input file for the fragment pool approach with one plot of each land-use system randomly chosen from the eight possible plots and seven species. |10111100| presents the 1-0 matrix of one particular individual of the collected species with certain number of fragments, each fragment is in the input file one column. |00000| if a species does not occur in the plot all respective columns are filled with zeros. Species one, three and seven occurs in forest plot 1, species seven is shared with jungle rubber plot 1. Oil palm plot 3 and rubber plot 6 share species four and six, species five only occurs in rubber plot 6.

| Fragment pool        | Species 1 | Species 2  | Species 3  | Species 4  | Species 5 | Species 6      | Species 7  |
|----------------------|-----------|------------|------------|------------|-----------|----------------|------------|
| Forest plot 1        | 11111111  | 0000000000 | 1111111111 | 0000000000 | 00000     | 00000000000000 | 1111111111 |
| Forest plot 1        | 11111111  | 0000000000 | 1111111111 | 0000000000 | 00000     | 00000000000000 | 1111111111 |
| Forest plot 1        | 11111111  | 0000000000 | 1111111111 | 0000000000 | 00000     | 00000000000000 | 1111111111 |
| Forest plot 1        | 11111111  | 0000000000 | 1111111111 | 0000000000 | 00000     | 00000000000000 | 1111111111 |
| Forest plot 1        | 11111111  | 0000000000 | 1111111111 | 0000000000 | 00000     | 00000000000000 | 1111111111 |
| Forest plot 1        | 11111111  | 0000000000 | 1111111111 | 0000000000 | 00000     | 00000000000000 | 1111111111 |
| Forest plot 1        | 11111111  | 0000000000 | 1111111111 | 0000000000 | 00000     | 00000000000000 | 1111111111 |
| Forest plot 1        | 11111111  | 0000000000 | 1111111111 | 0000000000 | 00000     | 00000000000000 | 1111111111 |
| Forest plot 1        | 11111111  | 0000000000 | 1111111111 | 0000000000 | 00000     | 00000000000000 | 1111111111 |
| Forest plot 1        | 11111111  | 0000000000 | 1111111111 | 0000000000 | 00000     | 00000000000000 | 1111111111 |
| Jungle rubber plot 1 | 00000000  | 1111111111 | 0000000000 | 0000000000 | 00000     | 00000000000000 | 1111111111 |
| Jungle rubber plot 1 | 00000000  | 1111111111 | 0000000000 | 0000000000 | 00000     | 00000000000000 | 1111111111 |
| Jungle rubber plot 1 | 00000000  | 1111111111 | 0000000000 | 0000000000 | 00000     | 00000000000000 | 1111111111 |
| Jungle rubber plot 1 | 00000000  | 1111111111 | 0000000000 | 0000000000 | 00000     | 00000000000000 | 1111111111 |
| Jungle rubber plot 1 | 00000000  | 1111111111 | 0000000000 | 0000000000 | 00000     | 00000000000000 | 1111111111 |
| Jungle rubber plot 1 | 00000000  | 1111111111 | 0000000000 | 0000000000 | 00000     | 00000000000000 | 1111111111 |
| Jungle rubber plot 1 | 00000000  | 1111111111 | 0000000000 | 0000000000 | 00000     | 00000000000000 | 1111111111 |
| Jungle rubber plot 1 | 00000000  | 1111111111 | 0000000000 | 0000000000 | 00000     | 00000000000000 | 1111111111 |
| Jungle rubber plot 1 | 00000000  | 1111111111 | 0000000000 | 0000000000 | 00000     | 00000000000000 | 1111111111 |
| Jungle rubber plot 1 | 00000000  | 1111111111 | 0000000000 | 0000000000 | 00000     | 00000000000000 | 1111111111 |
| Jungle rubber plot 1 | 00000000  | 1111111111 | 0000000000 | 0000000000 | 00000     | 00000000000000 | 1111111111 |
| Oil palm plot 3      | 00000000  | 0000000000 | 0000000000 | 1111111111 | 00000     | 11111111111111 | 0000000000 |
| Oil palm plot 3      | 00000000  | 0000000000 | 0000000000 | 1111111111 | 00000     | 11111111111111 | 0000000000 |
| Oil palm plot 3      | 00000000  | 0000000000 | 0000000000 | 1111111111 | 00000     | 11111111111111 | 0000000000 |
| Oil palm plot 3      | 00000000  | 0000000000 | 0000000000 | 1111111111 | 00000     | 11111111111111 | 0000000000 |
| Oil palm plot 3      | 00000000  | 0000000000 | 0000000000 | 1111111111 | 00000     | 11111111111111 | 0000000000 |
| Oil palm plot 3      | 00000000  | 0000000000 | 0000000000 | 1111111111 | 00000     | 11111111111111 | 0000000000 |
| Oil palm plot 3      | 00000000  | 0000000000 | 0000000000 | 1111111111 | 00000     | 11111111111111 | 0000000000 |
| Oil palm plot 3      | 00000000  | 0000000000 | 0000000000 | 1111111111 | 00000     | 11111111111111 | 0000000000 |
| Oil palm plot 3      | 00000000  | 0000000000 | 0000000000 | 1111111111 | 00000     | 11111111111111 | 0000000000 |
| Oil palm plot 3      | 00000000  | 0000000000 | 0000000000 | 1111111111 | 00000     | 11111111111111 | 0000000000 |
| Rubber plot 6        | 00000000  | 0000000000 | 0000000000 | 1111111111 | 11111     | 11111111111111 | 0000000000 |
| Rubber plot 6        | 00000000  | 0000000000 | 0000000000 | 1111111111 | 11111     | 11111111111111 | 0000000000 |
| Rubber plot 6        | 00000000  | 0000000000 | 0000000000 | 1111111111 | 11111     | 11111111111111 | 0000000000 |
| Rubber plot 6        | 00000000  | 0000000000 | 0000000000 | 1111111111 | 11111     | 11111111111111 | 0000000000 |
| Rubber plot 6        | 00000000  | 0000000000 | 0000000000 | 1111111111 | 11111     | 11111111111111 | 0000000000 |
| Rubber plot 6        | 00000000  | 0000000000 | 0000000000 | 1111111111 | 11111     | 11111111111111 | 0000000000 |
| Rubber plot 6        | 00000000  | 0000000000 | 0000000000 | 1111111111 | 11111     | 11111111111111 | 0000000000 |
| Rubber plot 6        | 00000000  | 0000000000 | 0000000000 | 1111111111 | 11111     | 11111111111111 | 0000000000 |
| Rubber plot 6        | 00000000  | 0000000000 | 0000000000 | 1111111111 | 11111     | 11111111111111 | 0000000000 |
| Rubber plot 6        | 00000000  | 0000000000 | 0000000000 | 1111111111 | 11111     | 11111111111111 | 0000000000 |
| Rubber plot 6        | 00000000  | 0000000000 | 0000000000 | 1111111111 | 11111     | 11111111111111 | 0000000000 |

**Appendix 2a:** Illustration of the input file for the clone fragment pool matrix calculation with one plot of each land-use system randomly chosen from the eight possible plots and seven species. |11111111| presents the exact same number of fragments of the original individual of the collected species with certain number of fragments, each fragment is in the input file one column. |00000| if a species does not occur in the plot all respective columns are filled with zeros. Resulting pairwise distance matrix reflects the species dissimilarity between each plot, the genetic dissimilarity is zero.
